# Supplementary material for: Retracted Article: Circular RNA PTK2 modifies the progression and radiosensitivity in gastric cancer via miR-369-3p/ZEB1 axis
Source: Royal Society of Chemistry journal article supplement (doi:10.1039/c9ra08525d), 2020-01-01
Supplement: c9ra08525d1.pdf [file c9ra08525d1.pdf]

Supplement data

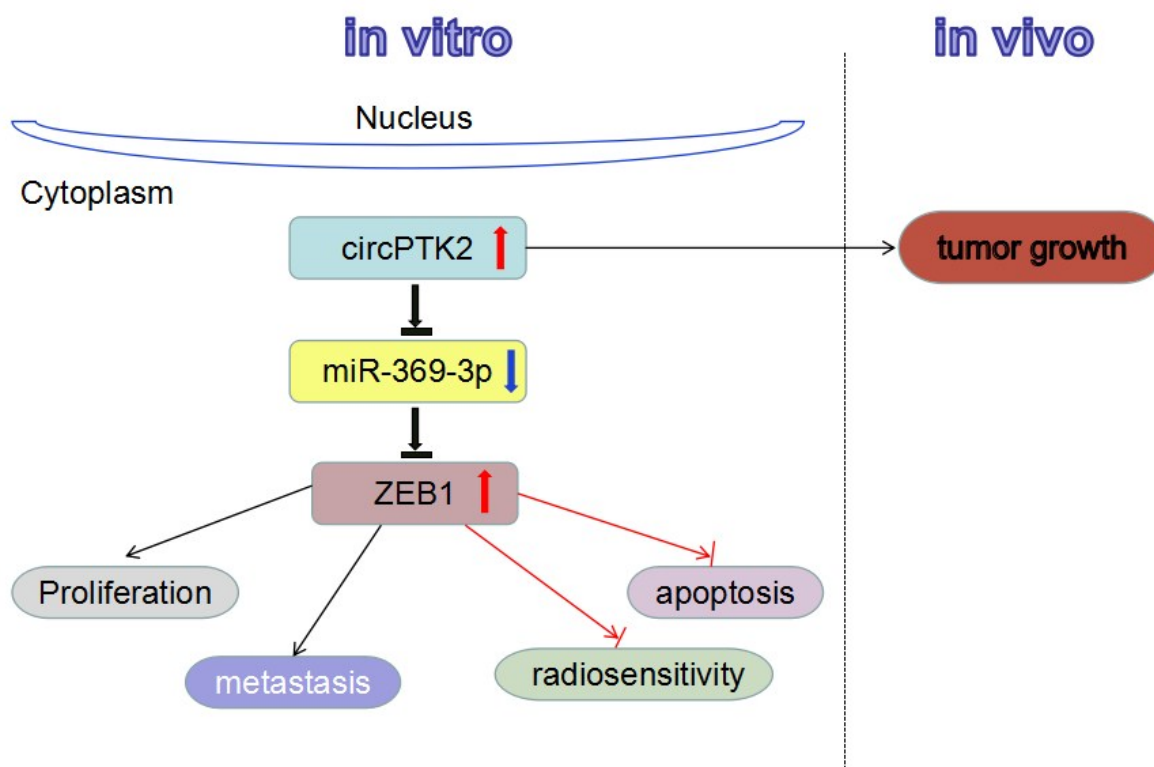

Fig. s1 The outline diagram of the present study.

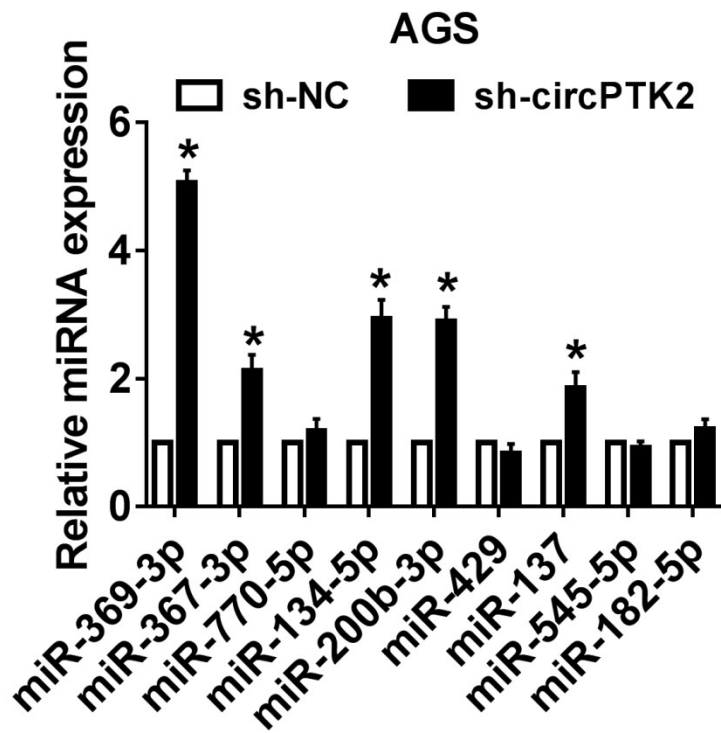

Fig. s2 The predicted targets of circPTK2 which served as tumor suppressors in GC progression.

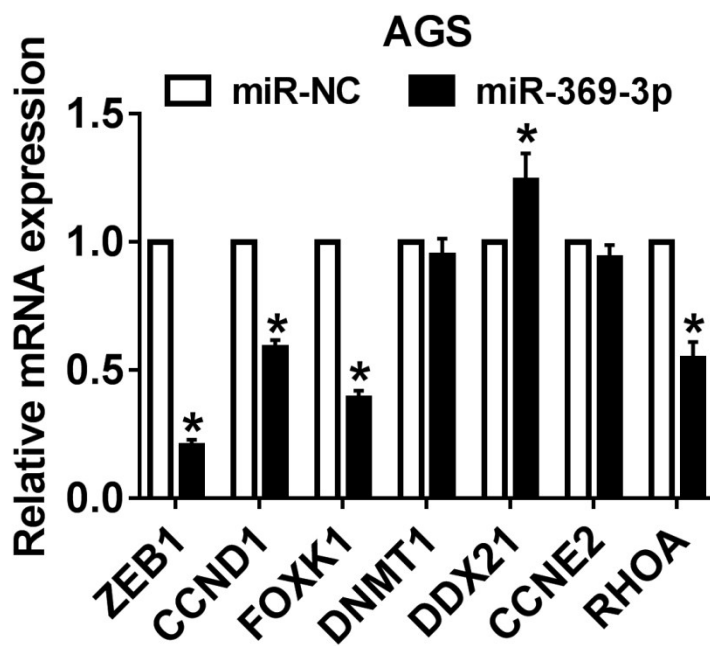

Fig. s3 The possible targeted genes of miR-369-3p which were upregulated in GC.
